# Supplementary material for: A new telomerase RNA element that is critical for telomere elongation
Source: PubMed Central journal article supplement (PMC3763530; doi:10.1093/nar/gkt514), 2013-06-19
Supplement: supp_gkt514_nar-01033-r-2013-File008.pdf [file supp_gkt514_nar-01033-r-2013-File008.pdf]

# **SUPPLEMENTAL MATERIAL**

## **A new telomerase RNA element that is critical for telomere elongation.**

Nancy Laterreur<sup>1</sup>, Sébastien Eschbach<sup>2</sup>, Daniel Lafontaine<sup>2</sup> and Raymund J. Wellinger<sup>1</sup>.

1. Department of Microbiology and infectious diseases

2. Department of Biology

RNA Group

Université de Sherbrooke

3201, rue Jean-Mignault

Sherbrooke, Québec, Canada

J1E 4K8

Tel: 819 821 8000 ext 75214

Fax: 819 820 6831

Address correspondence to Raymund J. Wellinger ([raymund.wellinger@usherbrooke.ca](mailto:raymund.wellinger@usherbrooke.ca))

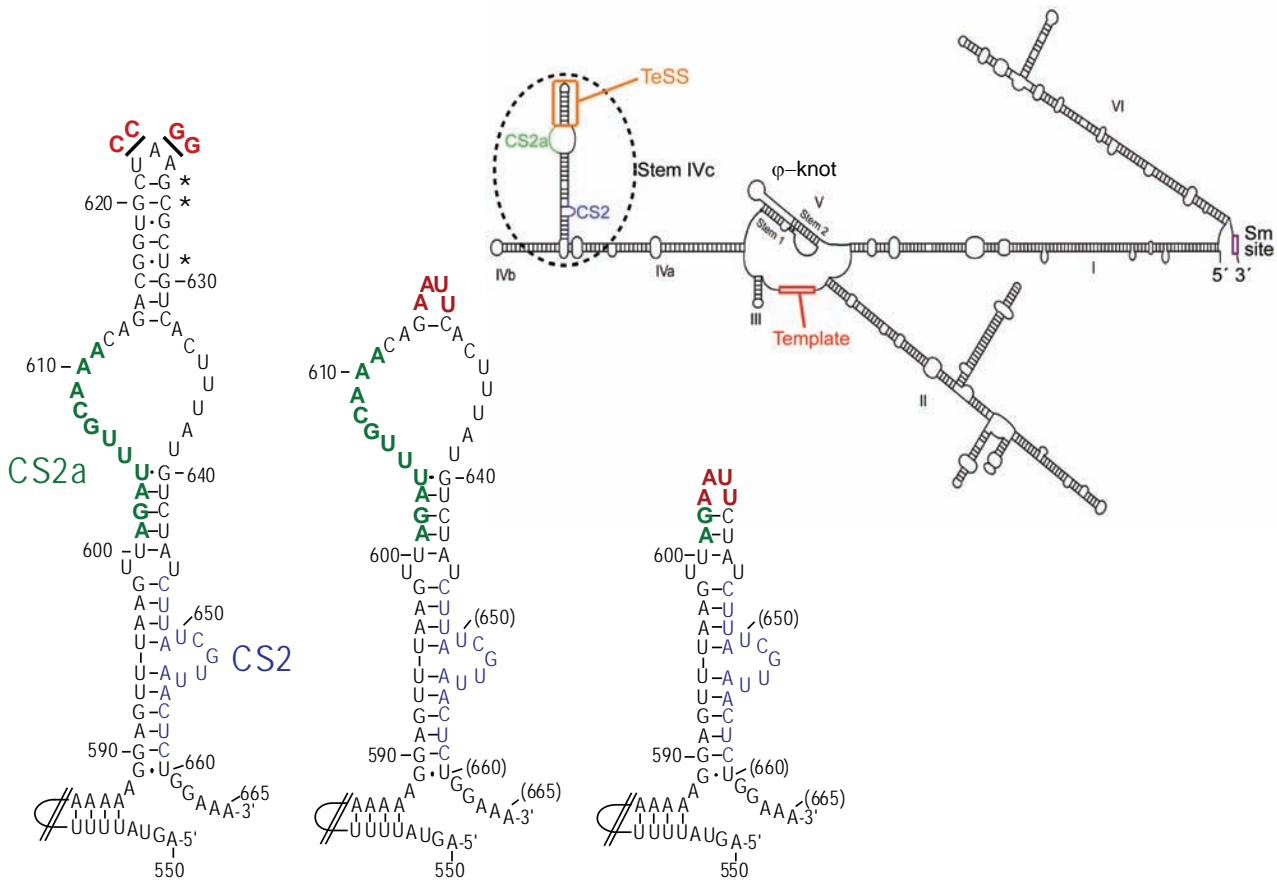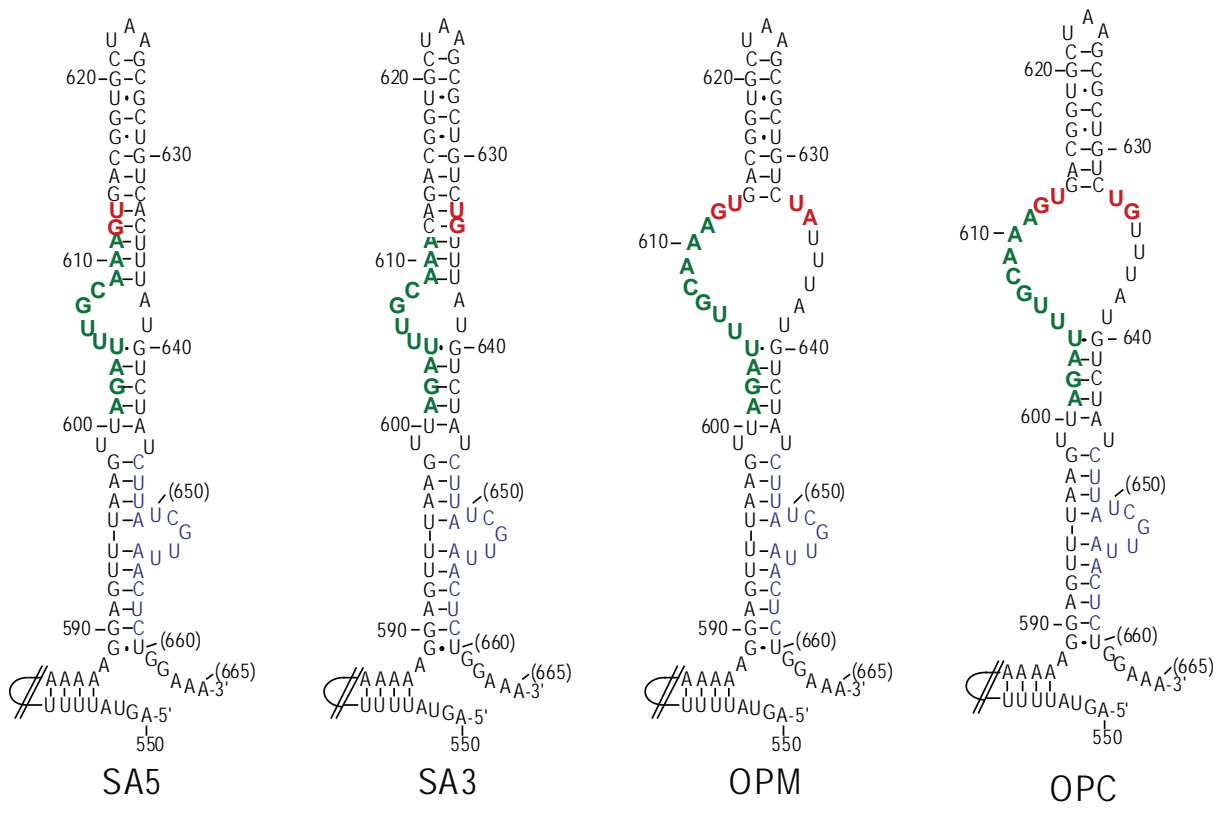

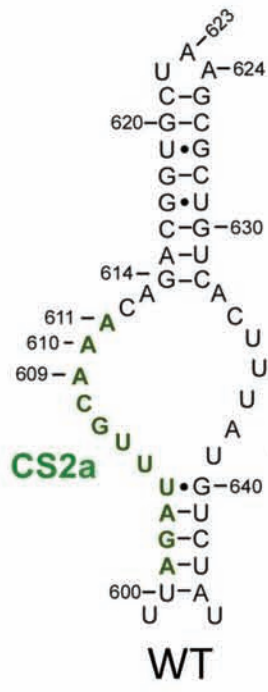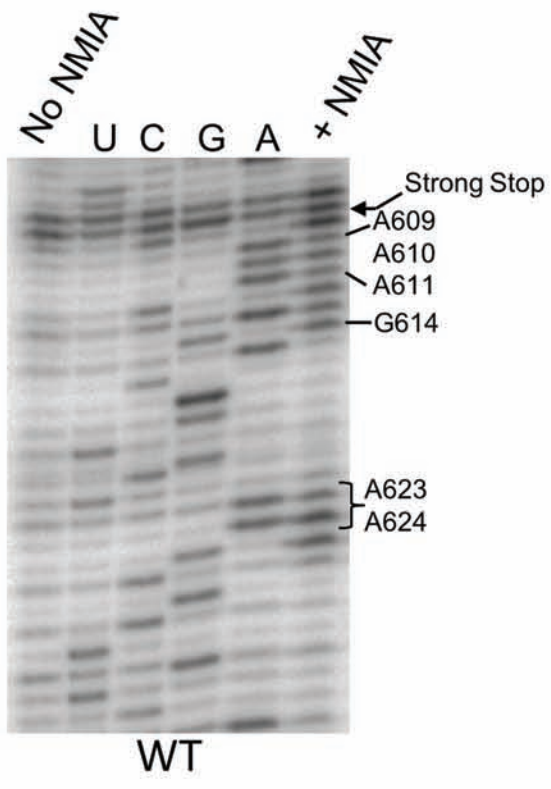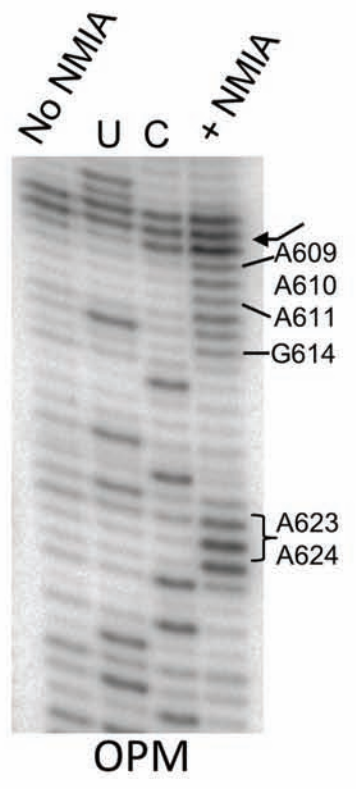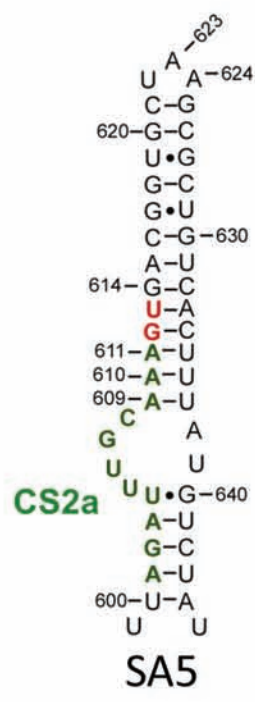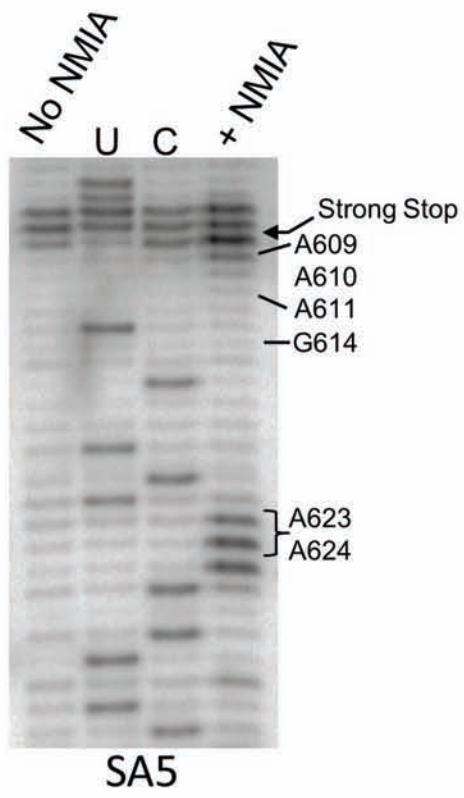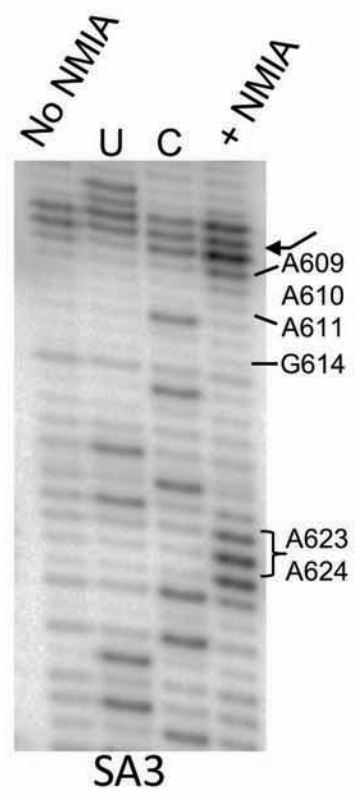

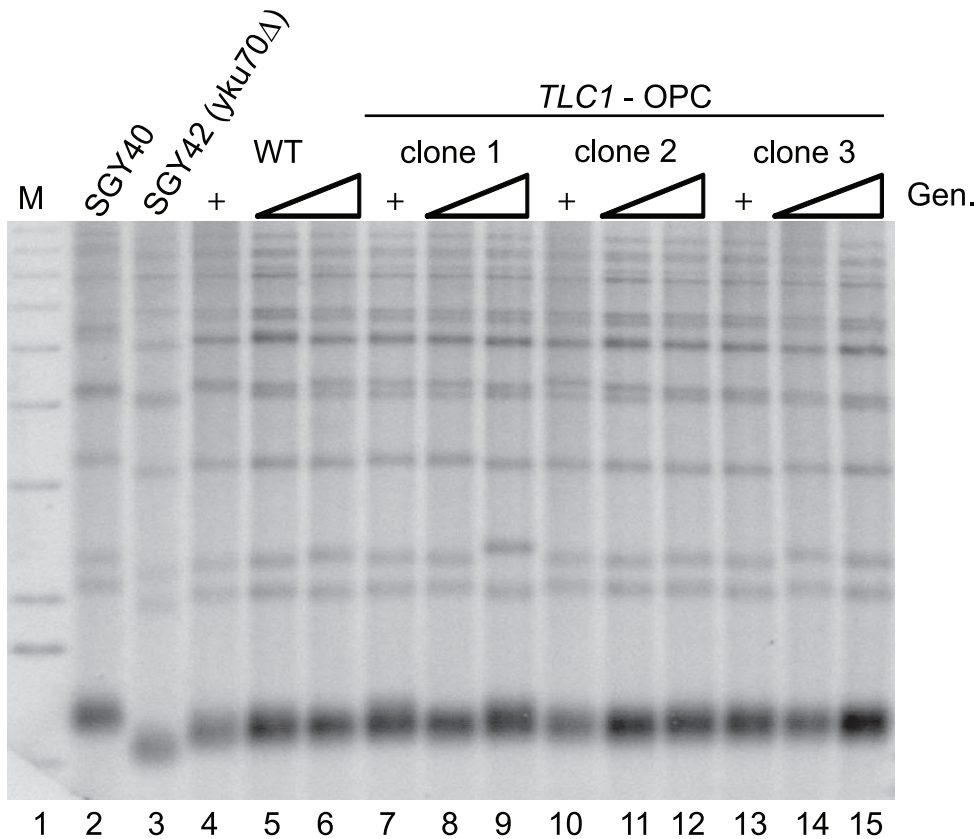

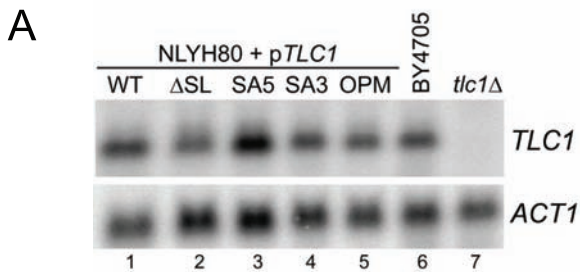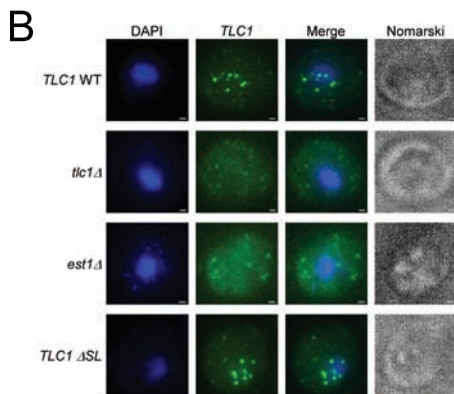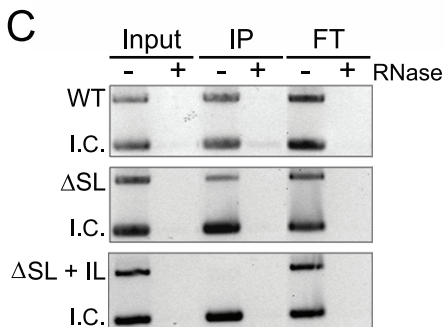

## SUPPLEMENTARY Tables

**Table S1: Yeast strains**

| Name   | Genotype                                                                                                                                                                                                                                     |
|--------|----------------------------------------------------------------------------------------------------------------------------------------------------------------------------------------------------------------------------------------------|
| NLYH80 | <i>MAT<math>\alpha</math> ura3-52 lys2-801 ade2-101 trp1<math>\Delta</math>63 his3<math>\Delta</math>200 leu2<math>\Delta</math>1 VR-ADE2-T tlc1<math>\Delta</math>::LEU2 HA3-EST1 SME1-13MYC-KMX</i>                                        |
| NLYH97 | <i>MAT<math>\alpha</math> ura3-52 lys2-801 ade2-101 trp1<math>\Delta</math>63 his3<math>\Delta</math>200 leu2<math>\Delta</math>1 VR-ADE2-T tlc1<math>\Delta</math>::LEU2 yku70<math>\Delta</math>::KanMX HA3-EST1 SME1-13MYC-KMX</i>        |
| NLYH95 | <i>MAT<math>\alpha</math> ura3-52 lys2-801 ade2-101 trp1<math>\Delta</math>63 his3<math>\Delta</math>200 leu2<math>\Delta</math>1 VR-ADE2-T tlc1<math>\Delta</math>::NatMX est1<math>\Delta</math>::LoxP SME1-13MYC-KMX</i>                  |
| NLYH55 | <i>MAT<math>\alpha</math> ura3-52 lys2-801 ade2-101 trp1<math>\Delta</math>63 his3<math>\Delta</math>200 leu2<math>\Delta</math>1 VR-ADE2-T tlc1<math>\Delta</math>::NatMX cdc13<math>\Delta</math>::KanMX</i>                               |
| NLYH59 | <i>MAT<math>\alpha</math> ura3-52 lys2-801 ade2-101 trp1<math>\Delta</math>63 his3<math>\Delta</math>200 leu2<math>\Delta</math>1 VR-ADE2-T tlc1<math>\Delta</math>::NatMX cdc13<math>\Delta</math>::KanMX est1<math>\Delta</math>::LoxP</i> |
| SGY40  | <i>MAT<math>\alpha</math> ura3-52 lys2-801 ade2-101 trp1<math>\Delta</math>63 his3<math>\Delta</math>200 leu2<math>\Delta</math>1 VR-ADE2-T</i>                                                                                              |
| SGY42  | <i>MAT<math>\alpha</math> ura3-52 lys2-801 ade2-101 trp1<math>\Delta</math>63 his3<math>\Delta</math>200 leu2<math>\Delta</math>1 VR-ADE2-T yku70<math>\Delta</math>::LEU2</i>                                                               |

**Table S2: Plasmids**

| Name                  | Description                                               | Reference                  |
|-----------------------|-----------------------------------------------------------|----------------------------|
| pAZ1                  | <i>URA3, CEN, TLC1</i>                                    | (68)                       |
| pTLC1TRP              | <i>TRP1, CEN, TLC1</i>                                    | (39)                       |
| pTLC1- $\Delta$ SL    | <i>TRP1, CEN, TLC1<math>\Delta</math>615-630::GAATTC</i>  | (37)                       |
| pTLC1- $\Delta$ SL+IL | <i>TRP1, CEN, TLC1<math>\Delta</math>602-642::GAATTC</i>  | (37)                       |
| pTLC1-SA5             | <i>TRP1, CEN, TLC1 (C612G, A613T)</i>                     | This study                 |
| pTLC1-SA3             | <i>TRP1, CEN, TLC1 (A633T, C634G)</i>                     | This study                 |
| pTLC1-OPM             | <i>TRP1, CEN, TLC1 (C612G, A613T, A633T, C634A)</i>       | This study                 |
| pTLC1-OPC             | <i>TRP1, CEN, TLC1 (C612G, A613T, A633T, C634G)</i>       | This study                 |
| pVL1107               | <i>LEU2, CEN, CDC13-EST2</i>                              | (32)                       |
| pVL816                | Integrative plasmid containing <i>HA<sub>3</sub>-EST1</i> | (42)                       |
| pRS423- <i>EST1</i>   | <i>HIS3, 2 <math>\mu</math>m, EST1</i>                    | Kind gift from K. Friedman |
| pSH62                 | <i>GAL-CRE</i>                                            | (41)                       |
| pUG6                  | LoxP-KMX-LoxP cassette                                    | (41)                       |
| p316-GAL-CRE          | <i>URA3, CEN, GAL1-CRE</i>                                | This study                 |
| pFA6a-13Myc-KMX       | 13Myc-KanMX6 cassette                                     | (43)                       |
| pAD-A258              | <i>CEN, URA3, tlc1<math>\Delta</math>148-440</i>          | This study                 |

**Table S3 : Primers**

| <b>Name</b>                                                                | <b>5' – 3' sequence</b>                                                                                     |
|----------------------------------------------------------------------------|-------------------------------------------------------------------------------------------------------------|
| <b>PCR-mediated site-directed mutagenesis on <i>TLC1</i></b>               |                                                                                                             |
| Apical loop 1 – FOR                                                        | GCAAACAGACGGTGCCCAGCGCTGTCACTTTA                                                                            |
| Apical loop 1 – REV                                                        | TAAAGTGACAGCGCTGGGCACCGTCTGTTTGC                                                                            |
| Apical loop 2 – FOR                                                        | CAAACAGACGGTGCTGGGCGCTGTCACTTTATG                                                                           |
| Apical loop 2 – REV                                                        | CATAAAGTGACAGCGCCCAGCACCGTCTGTTTGC                                                                          |
| SA5 – FOR                                                                  | AGTTAGATTTGCAAAGTGACGGTGCTAAGCGCT                                                                           |
| SA5 – REV                                                                  | AGCGCTTAGCACCGTCACTTTGCAAATCTAACT                                                                           |
| SA3 – FOR                                                                  | GACGGTGCTAAGCGCTGTCTGTTTATGTCTATCTTATCGTT                                                                   |
| SA3 – REV                                                                  | AACGATAAGATAGACATAAACAGACAGCGCTTAGCACCGTC                                                                   |
| OPM – FOR                                                                  | GACGGTGCTAAGCGCTGTCTATTTATGTCTATCTTATCGTT                                                                   |
| OPM – REV                                                                  | AACGATAAGATAGACATAAATAGACAGCGCTTAGCACCGTC                                                                   |
| <b>Fluorescent <i>in-situ</i> Hybridization probes (Ref. 69)</b>           |                                                                                                             |
| <i>* indicates amino-allyl modified T positions</i>                        |                                                                                                             |
| TLC1-1                                                                     | T*GCGCACACACAAGCAT*CTACACTGACACCAGCAT*ACTCGAAAT<br>TCTT*TG                                                  |
| TLC1-2                                                                     | CT*AATAACAATT*AGCTGTAACATT*TGTGTGTGGGGT*GTGGTGA<br>TGGT*AGGC                                                |
| TLC1-3                                                                     | TT*CCAGAGTTAACGAT*AAGATAGACAT*AAAGTGACAGCGCT*TAG<br>CACCGT*C                                                |
| TLC1-4                                                                     | TTACGT*TCTTGATCTT*GTGTCATTGTT*CAGTTACTGAT*CGCCCGC<br>AAACCT*                                                |
| TLC1-5                                                                     | TGCAT*CGAAGGCAT*TAGGAGAAGT*AGCTGTGAAT*ACAACACCAA<br>GAT*TCA                                                 |
| <b>Selective 2'Hydroxyl Acylation analyzed by Primer Extension (SHAPE)</b> |                                                                                                             |
| WT                                                                         | CTTCCGCTTCTCTTTAGCTCCGCGAAGATAGACATAAAGTGACAGC<br>GCTTAGCACCGTCTGTTTGCAAATCTAACTTCGCTATAGTGAGTCGT<br>ATTACC |
| SA5                                                                        | CTTCCGCTTCTCTTTAGCTCCGCGAAGATAGACATAAAGTGACAGC<br>GCTTAGCACCGTCACTTTGCAAATCTAACTTCGCTATAGTGAGTCGT<br>ATTACC |
| SA3                                                                        | CTTCCGCTTCTCTTTAGCTCCGCGAAGATAGACATAAACAGACAGC<br>GCTTAGCACCGTCTGTTTGCAAATCTAACTTCGCTATAGTGAGTCGT<br>ATTACC |
| OPM                                                                        | CTTCCGCTTCTCTTTAGCTCCGCGAAGATAGACATAAATAGACAGCGC<br>TTAGCACCGTCACTTTGCAAATCTAACTTCGCTATAGTGAGTCGTATTA<br>CC |
| T7 promo                                                                   | GGTAATACGACTCACTATAGCG                                                                                      |
| <b>RT-PCR</b>                                                              |                                                                                                             |
| P0 (RT)                                                                    | GATCATCACGGTGCCGGATCCTTGTGTGTGGGTGTGGTGA                                                                    |
| P1 (PCR-FOR)                                                               | TGTGCGCAATTTGTGGTTTTTAT                                                                                     |
| P2 (PCR-Rev)                                                               | GTGATCTGCAGATCATCACGGTGCCGGATCC                                                                             |
| <b><i>In vitro</i> telomerase activity assay (Ref. 70)</b>                 |                                                                                                             |
| NLTAG1-3                                                                   | TAGGGTAGTAGTAGGG                                                                                            |

## SUPPLEMENTARY Figure Legends

### Figure S1. Schematic display of all stem IVc RNA structures.

MFold predicted secondary structures of the stem IVc arm of the *Tlc1* RNA and key elements. Top right: schematic representation of the predicted secondary structure of the entire RNA. Highlights are as in Figure 1: circled region indicates location of stem IVc. Blue: CS2 element. Green: CS2a element. Stars (\*): positions of co-varying base pairs. Red: positions and mutated nucleotides of the corresponding *TLC1* alleles.

### Figure S2. RNA structure analyses by SHAPE.

SHAPE modification performed on *in vitro* transcribed RNA comprising the stem-loop IVc sub-structure of wild-type (WT), or mutant OPM, SA5 and SA3 sequence. First lane of each panel: reactions were performed in absence of NMIA (No NMIA). Last lane of each panel: reactions were done in presence of NMIA (+ NMIA). U, C, G and A represent sequencing lanes on the WT panel; only lanes representing U and C were loaded on the OPM, SA5 and SA3 gels. Predicted secondary structures of the WT and the SA5 mutant are shown on the left for reference. Green nucleotides: CS2a element. Red nucleotides: altered positions. Diagnostic nucleotide positions are indicated on the right of each panel. Arrow indicates “strong stop” at positions 606/607. These nucleotides, for unknown reasons, cause a strong stop in the RT-reaction, even in the absence of the NMIA compound (see left most lanes).

### Figure S3. Normal telomere length in cells harbouring the *tlc1-OPC* allele.

Telomere length analysis of genomic DNA extracted from NLYH80 cells expressing WT or the *tlc1-OPC* allele. Three independent clones were tested for the OPC mutant. Lane 1 (M): end-labeled 1 Kb DNA ladder. Lanes 2 and 3: WT (SGY40) and *yku70Δ* (SGY42) controls,



respectively. Lanes 4-6: NLYH80 + p*TLC1* WT. First lane of each triplet contains DNA from cells expressing both the *tlc1-OPC* allele and the complementing WT *TLC1* plasmid pAZ1. Other two lanes of each triplet contain DNA from cells expressing only the *tlc1-OPC* allele grown for 65 and 105 generations, respectively.

**Figure S4. Tlc1 RNA expression levels, its localization and co-immunoprecipitation with Est1.**

**(A)** Top: Northern blot analysis of total RNA extracted from the NLYH80, BY4705 (WT) and *tlc1* $\Delta$  strains. Lanes 1-5 contain total RNA extracted from NLYH80 cells expressing the indicated *TLC1* alleles. Lane 6: total RNA extracted from a WT strain. Lane 7: total RNA extracted from NLYH80 that has lost the WT complementing *TLC1* plasmid pAZ1.

**(B)** Detection of the Tlc1-RNA in WT, *tlc1* $\Delta$ , *est1* $\Delta$  and  $\Delta$ SL expressing cells by FISH assay. DAPI panels: DNA staining. *TLC1* panels: Tlc1-RNA visualized with Cy3-labeled probes (see supplementary table 3 for sequences). Merge panels: merge of DAPI and Cy3 channels. The same intensity levels were set for all except the Normarski images. Scale bar = 500 nm.

**(C)** RT-PCR analysis of Est1 binding to WT,  $\Delta$ SL and  $\Delta$ SL+IL Tlc1 RNAs. After immunoprecipitation of HA<sub>3</sub>-Est1, RT-PCR was performed with the primers indicated in Supplementary Table 3. NLYH80 strain was transformed with both the indicated *TLC1*-expressing plasmids (WT,  $\Delta$ SL and  $\Delta$ SL+IL) and a smaller form of *TLC1*, *tlc1* $\Delta$ 148-440, that serves as an internal control (I.C.) for Est1-binding. RNAs extracted from the input and the post-IP flowthrough (FT) were also analyzed as indicated. RNase treatments (+ lanes) of all samples in parallel served to control for unspecific amplifications or DNA contamination.

## SUPPLEMENTARY References

68. Gravel, S. and Wellinger, R.J. (2002) Maintenance of double-stranded telomeric repeats as the critical determinant for cell viability in yeast cells lacking Ku. *Mol Cell Biol*, **22**, 2182-2193.
69. Chartrand, P., Bertrand, E., Singer, R.H. and Long, R.M. (2000) Sensitive and high-resolution detection of RNA in situ. *Methods Enzymol*, **318**, 493-506.
70. Lue, N.F. and Xia, J. (1998) Species-specific and sequence-specific recognition of the dG-rich strand of telomeres by yeast telomerase. *Nucleic Acids Res*, **26**, 1495-1502.
